# Supplementary material for: The Photosystem II Assembly Factor Ycf48 from the Cyanobacterium Synechocystis sp. PCC 6803 Is Lipidated Using an Atypical Lipobox Sequence
Source: MDPI journal article supplement (doi:10.3390/ijms22073733), 2021-04-02
Supplement: s1 [file s1]

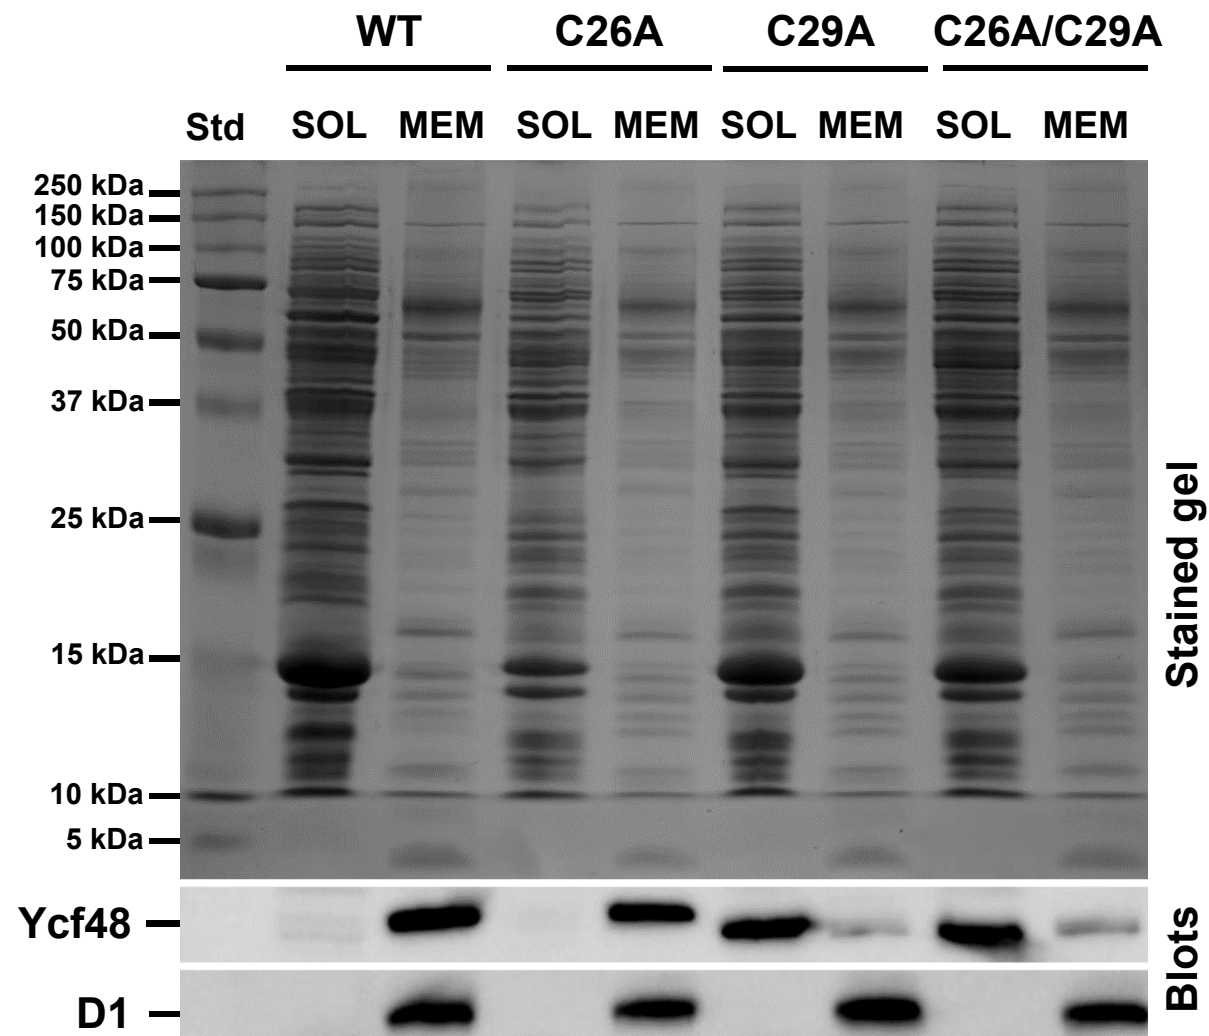

**Fig. S1. Analysis of membrane and soluble fractions isolated from cells of WT and Cys26A, Cys29A and Cys26A/Cys29A mutants.** The membrane (MEM) and soluble (SOL) fractions were analysed using SDS PAGE, proteins electroblotted and Ycf48 and D1 were detected using specific antibodies. 1  $\mu$ g of Chl per membranes and corresponding amount of the soluble fraction were loaded for each sample.
